# Supplementary material for: Phylogenetic Signal Dissection of Heterogeneous 28S and 16S rRNA Genes in Spinicaudata (Branchiopoda, Diplostraca)
Source: MDPI journal article supplement (doi:10.3390/genes12111705), 2021-10-27
Supplement: s1 [file s1]

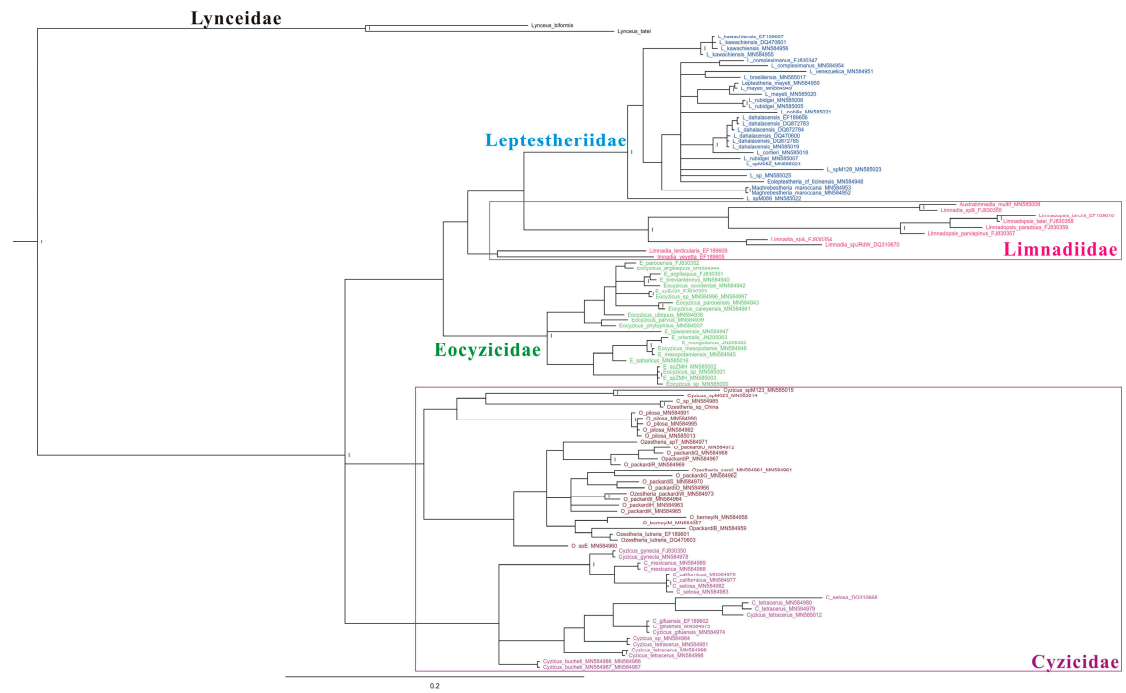

Figure S1. Bayesian phylogram inferred from 16S rRNA gene, using a 16-state doublet model. Only Bayesian posterior probabilities equivalent to 1 are shown.
