# Supplementary material for: Phylogenetic Signal Dissection of Heterogeneous 28S and 16S rRNA Genes in Spinicaudata (Branchiopoda, Diplostraca)
Source: MDPI journal article supplement (doi:10.3390/genes12111705), 2021-10-27
Supplement: s1 [file s1]

Table S2. Statistical comparison of the compositional heterogeneity observed across the taxa.

| Taxa                    | 28S rRNA |         | 16S rRNA |         |
|-------------------------|----------|---------|----------|---------|
|                         | p-value  | z-score | p-value  | z-score |
| <i>Cyzicus</i>          | 0.6995   | -0.5296 | 0.5165   | -0.1420 |
| <i>Ozestheria</i>       | 0.7340   | -0.6916 | 0.4497   | 0.1537  |
| <i>Eocycticus</i>       | 0.5881   | -0.5246 | 0.5224   | -0.2174 |
| <i>Leptestheria</i>     | 0.1860   | 0.8570  | 0.5976   | -0.2980 |
| <i>Eoleptestheria</i>   | 0.7750   | -0.7090 | 0.2500   | 0.6930  |
| <i>Maghrebestheria</i>  | 0.1160   | 1.0080  | 0.7495   | -0.7145 |
| <i>Limnadia</i>         | 0.7995   | -0.7738 | 0.2000   | 0.5370  |
| <i>Limnadopsis</i>      | 0.5085   | -0.2336 | 0.5308   | -0.3515 |
| <i>Imnadia</i>          | 0.8435   | -0.9958 | 0.3250   | 0.3950  |
| <i>Paralimnadia</i>     | 0.4063   | 0.1551  | 0.2745   | 0.4705  |
| <i>Metalimnadia</i>     | 0.4125   | 0.0825  |          |         |
| <i>Eulimnadia</i>       | 0.7659   | -0.7329 | 0.04*    | 2.998*  |
| <i>Calalimnadia</i>     | 0.5500   | -0.3470 |          |         |
| <i>Australimnadia</i>   | 0.2320   | 0.8620  | 0.574    | -0.296  |
| <i>Gondwanalimnadia</i> | 0.8750   | -0.9160 |          |         |

P-values indicate the statistical significance of test and z-scores quantify the amount of compositional heterogeneity (with \* indicating significant values). A Z-score value of more than 2 ( $p < 0.05$ ) indicated that the taxa were significantly compositionally heterogeneous. The test statistic for the individual taxa indicated that the nucleotide composition of 8 specimens is significantly biased: *Leptestheria* sp. of India ( $Z=2.817$ ,  $p=0$ ), *Leptestheria brevisrostris* ( $Z=4.763$ ,  $p=0$ ), *Ozestheria pilosa* (MN584994:  $Z=2.151$ ,  $p=0.05$ ; MN584993:  $Z=2.228$ ,  $p=0.025$ ), *Eulimnadia braueriana* ( $Z=3.013$ ,  $p=0.025$ ), *Eulimnadia* sp. C ( $Z=3.312$ ,  $p=0.025$ ), *Eulimnadia* sp. H ( $Z=2.156$ ,  $p=0.025$ ), *Eulimnadia* sp. K ( $Z=3.211$ ,  $p=0.025$ ). These seven taxa with the most strongly deviating nucleotide composition were excluded.
